# Supplementary material
Source: ML conference proceedings conference paper supplement (https://proceedings.neurips.cc/paper_files/paper/2023/hash/0f53ecc0d36a5d5d3d3e94d42c4b23ca-Abstract.html)
Supplement: Supplementary file 1 [file 0f53ecc0d36a5d5d3d3e94d42c4b23ca-Supplemental-Conference.zip]

Archive with 2 entries (2 files):
- Model_Diagnose-appendix.pdf
- __MACOSX/._Model_Diagnose-appendix.pdf
